# Supplementary material for: Progression to type 2 diabetes in women with a known history of gestational diabetes: systematic review and meta-analysis
Source: PubMed Central journal article supplement — BMJ. 2020 May 13;369:m1361. doi: 10.1136/bmj.m1361 (PMC7218708; doi:10.1136/bmj.m1361), 2020-05-13
Supplement: voue054101.ww.pdf [file voue054101.ww.pdf]

# **Supplementary Material**

**Progression to type 2 diabetes in women with a known history of gestational  
diabetes: A systematic review and meta-analysis**

**BMJ-2019-054101**

*Elpida Vounzoulaki, Kamlesh Khunti, Sophia C Abner, Bee K Tan, Melanie J Davies, Clare L Gillies*

## **Medline/Embase Search Strategy**

exp Diabetes Mellitus, Type 2/

(type 2 adj5 diabetes).mp.

(type II adj5 diabetes).mp.

non-insulin dependent diabetes.mp.

T2DM.mp

NIDDM.mp

1 OR 2 OR 3 OR 4 OR 5 OR 6

exp Diabetes, Gestational/

gestational diabetes.mp.

pregnancy induced diabetes.mp.

pregnancy-induced diabetes.mp.

GDM.mp.

8 OR 9 OR 10 OR 11 OR 12

7 AND 13

Limit 14 to (english language and humans and yr= "2000- 2020")



|                                      |   |   |   |   |   |   |   |   |   |
|--------------------------------------|---|---|---|---|---|---|---|---|---|
| Vigneault et al., 2015 <sup>47</sup> | ★ | ★ | ★ | ★ | - | ★ | ★ | - | 6 |
| Wang et al., 2012 <sup>48</sup>      | ★ | ★ | ★ | ★ | ★ | ★ | ★ | ★ | 8 |
| Yefet et al., 2019 <sup>49</sup>     | ★ | ★ | ★ | ★ | ★ | ★ | ★ | ★ | 8 |

*Table S2 supplements this quality assessment by including the confounders considered in the analysis of each study.*

**Table S2: Study confounders considered when assessing comparability with the NOS scale**

| Study                                     | List of confounders considered                                                                                                                                                                                               |
|-------------------------------------------|------------------------------------------------------------------------------------------------------------------------------------------------------------------------------------------------------------------------------|
| 1. Aberg et al., 2002 <sup>36</sup>       | adjusted for OGTT values during pregnancy, insulin treatment, maternal age, parity and year of delivery                                                                                                                      |
| 2. Albareda et al., 2003 <sup>35</sup>    | adjusted for age, length of follow-up, family history of diabetes and BMI at follow-up                                                                                                                                       |
| 3. Aziz et al., 2018 <sup>37</sup>        | did not adjust for confounders                                                                                                                                                                                               |
| 4. Chodick et al., 2010 <sup>34</sup>     | adjusted for age, parity, BMI, socioeconomic status, smoking                                                                                                                                                                 |
| 5. Daly et al., 2018 <sup>38</sup>        | adjusted for age, Townsend (deprivation) quintile, body mass index, and smoking                                                                                                                                              |
| 6. Herath et al., 2017 <sup>39</sup>      | adjusted for age at delivery, family history of T2DM in a first degree relative, history of GDM in a previous pregnancy, treatment with insulin during index pregnancy, birth weight, gestational age at delivery and parity |
| 7. Huopio et al., 2014 <sup>28</sup>      | adjusted for age, BMI, parity, follow-up time, smoking, physical activity                                                                                                                                                    |
| 8. Krishnaveni et al., 2007 <sup>40</sup> | adjusted for age, parity, socio-economic status, family history of diabetes and waist circumference                                                                                                                          |
| 9. A.J. Lee et al., 2007 <sup>41</sup>    | adjusted for age, race, height, parity, BMI, birth weight, gestational age insulin use in pregnancy, family history of diabetes                                                                                              |
| 10. H. Lee et al., 2008 <sup>42</sup>     | adjusted for age, family history of diabetes, educational level, income level, smoking drinking status, waist circumference, systolic blood pressure, total cholesterol, triglycerides. HDL- cholesterol                     |
| 11. Linne et al., 2002 <sup>43</sup>      | did not adjust for confounders                                                                                                                                                                                               |
| 12. Madarasz et al., 2009 <sup>44</sup>   | adjusted for age and BMI                                                                                                                                                                                                     |
| 13. Minooee et al., 2017 <sup>27</sup>    | adjusted for age, BMI, family history                                                                                                                                                                                        |
| 14. Mukerji et al., 2012 <sup>31</sup>    | adjusted for age, socioeconomic status and comorbidity                                                                                                                                                                       |
| 15. Pintaudi et al., 2015 <sup>45</sup>   | adjusted for age                                                                                                                                                                                                             |
| 16. Retnakaran et al., 2010 <sup>46</sup> | adjusted for age, ethnicity, family history of diabetes, breastfeeding, baseline b-cell function, waist circumference, and weight                                                                                            |
| 17. Vambergue et al., 2008 <sup>33</sup>  | adjusted for pre-pregnancy BMI, age at delivery, family history of diabetes, low social economical level, race, OGTT values during pregnancy and insulin treatment during pregnancy.                                         |
| 18. Vigneault et al., 2015 <sup>47</sup>  | did not adjust for confounders                                                                                                                                                                                               |
| 19. Wang et al., 2012 <sup>48</sup>       | adjusted for age, smoking, income, BMI, systolic blood pressure, parity and race                                                                                                                                             |
| 20. Yefet et al., 2019 <sup>49</sup>      | adjusted for age, BMI before pregnancy, the number of previous pregnancies, the number of previous births, fasting and 1 h OGTT results and the number of glucose charts for each woman                                      |

**Figure S1: Relative risk of T2DM in GDM and controls based on study design**

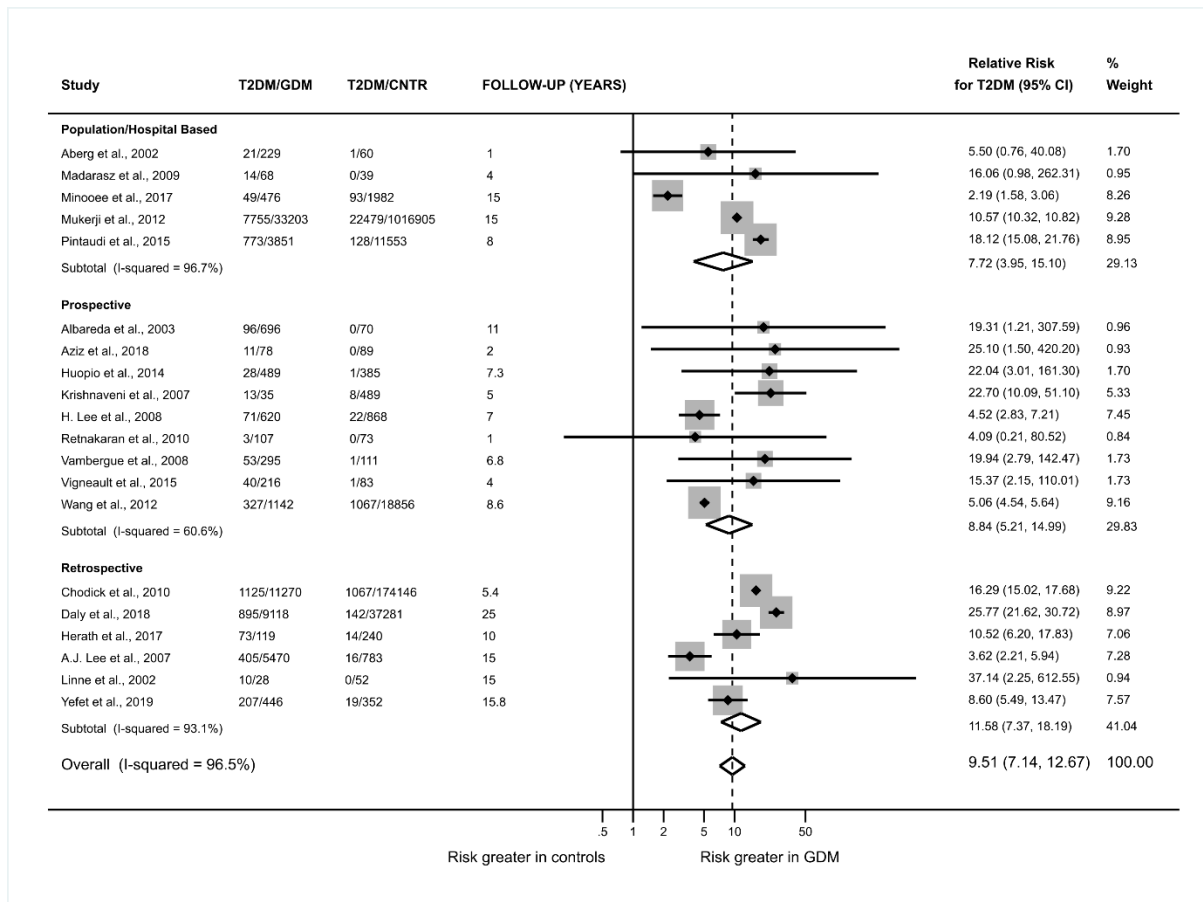

**Figure S2: Relative risk of T2DM in GDM and controls based on GDM screening method**

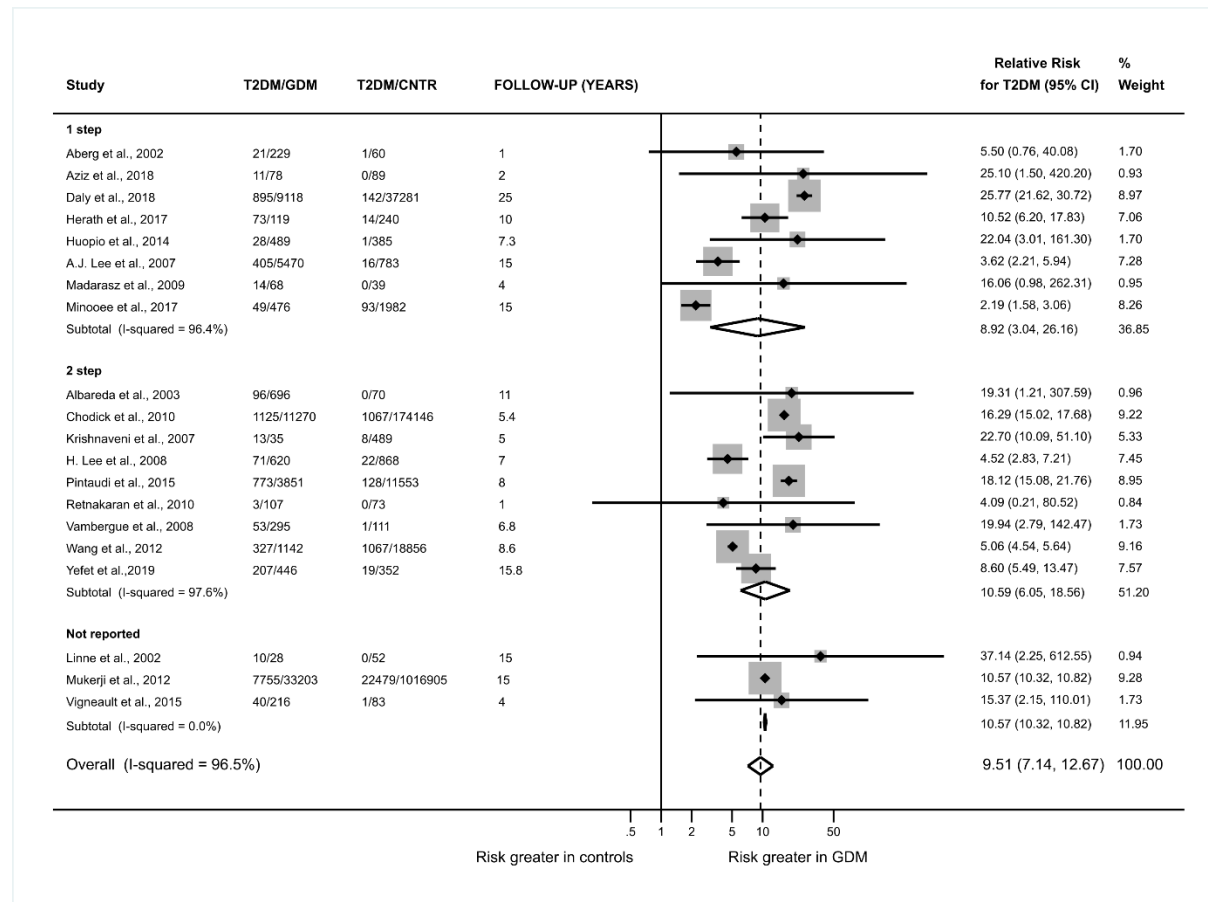

**Figure S3: Meta-analysis estimates given named study is omitted**

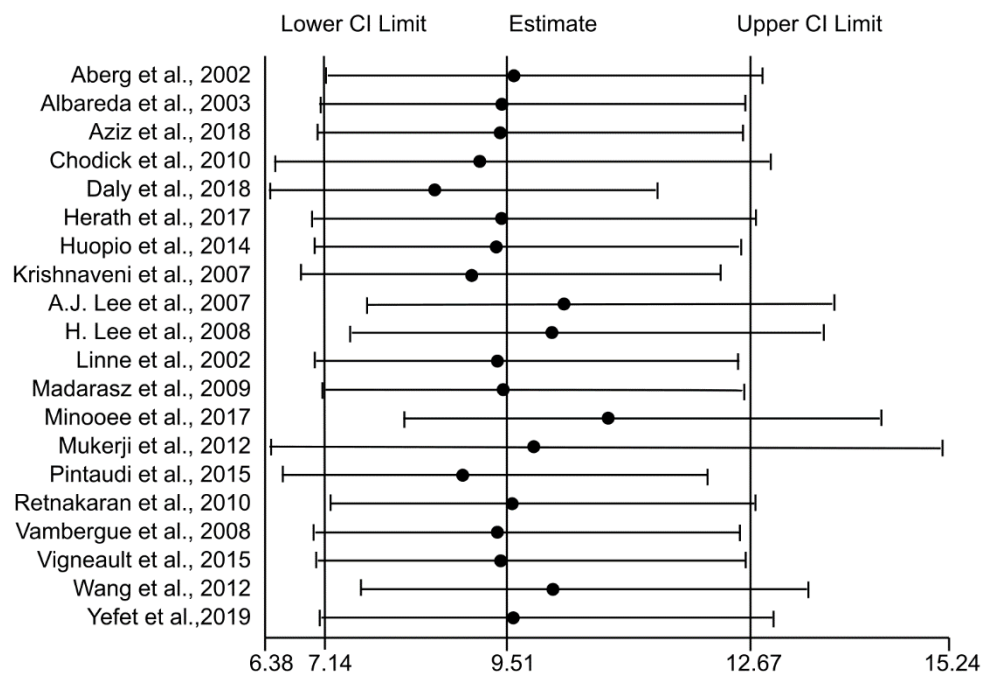

**Figure S4: Funnel plot for publication bias**

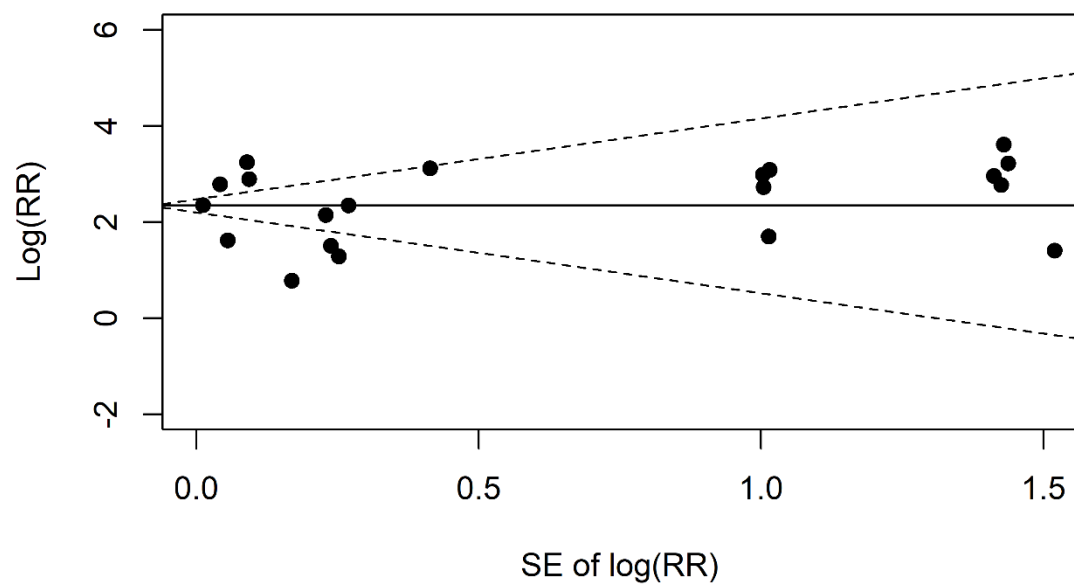

## **Documentation of how data were classified and coded**

### **Subgroup analysis:**

**Ethnicity:** Classified as White, Mixed and Non-White based on how it was reported by the primary studies and coded as a categorical variable using 1, 2 and 3 respectively.

**Follow-Up:** Three categories of follow-up length based on how the studies reported it: 1-5 years of follow-up, >5-10 years of follow-up and >10 years of follow-up and coded as a categorical variable using 1, 2 and 3 respectively.

**Study Design:** Separated into categories based on how the studies reported themselves- Prospective, Retrospective and Population/Hospital Based and coded as a categorical variable using 1, 2 and 3 respectively.

**Screening Method for GDM:** Separated into categories based on the screening method the study used to diagnose GDM (one step, two step) and coded as 1 and 2 respectively. Studies with no information on GDM screening were assigned missing values and were presented as a separate category entitled "Not reported" in the forest plot of the analysis.

### **Meta-regressions:**

For the meta-regressions, we used publication year of study, mean age of study participants, BMI of study participants and follow-up time.

**Table of data in figure 2**

| Study                       | T2DM/GDM   | T2DM/CNTR     | FOLLOW-UP<br>(YEARS) | Relative Risk for<br>T2DM | 95% CI |        | % WEIGHT |
|-----------------------------|------------|---------------|----------------------|---------------------------|--------|--------|----------|
| Aberg et al., 2002          | 21/229     | 1/60          | 1                    | 5.50                      | 0.76   | 40.08  | 1.70     |
| Albareda et al., 2003       | 96/696     | 0/70          | 11                   | 19.31                     | 1.21   | 307.59 | 0.96     |
| Aziz et al., 2018           | 11/78      | 0/89          | 2                    | 25.10                     | 1.50   | 420.20 | 0.93     |
| Chodick et al., 2010        | 1125/11270 | 1067/174146   | 5.4                  | 16.29                     | 15.02  | 17.68  | 9.22     |
| Daly et al., 2018           | 895/9118   | 142/37281     | 25                   | 25.77                     | 21.62  | 30.72  | 8.97     |
| Herath et al., 2017         | 73/119     | 14/240        | 10                   | 10.52                     | 6.20   | 17.83  | 7.06     |
| Huopio et al., 2014         | 28/489     | 1/385         | 7.3                  | 22.04                     | 3.01   | 161.30 | 1.70     |
| Krishnaveni et al., 2007    | 13/35      | 8/489         | 5                    | 22.70                     | 10.09  | 51.10  | 5.33     |
| A.J. Lee et al., 2007       | 405/5470   | 16/783        | 15                   | 3.62                      | 2.21   | 5.94   | 7.28     |
| H. Lee et al., 2008         | 71/620     | 22/868        | 7                    | 4.52                      | 2.83   | 7.21   | 7.45     |
| Linne et al., 2002          | 10/28      | 0/52          | 15                   | 37.14                     | 2.25   | 612.55 | 0.94     |
| Madarasz et al., 2009       | 14/68      | 0/39          | 4                    | 16.06                     | 0.98   | 262.31 | 0.95     |
| Minooee et al., 2017        | 49/476     | 93/1982       | 15                   | 2.19                      | 1.58   | 3.06   | 8.26     |
| Mukerji et al., 2012        | 7755/33203 | 22479/1016905 | 15                   | 10.57                     | 10.32  | 10.82  | 9.28     |
| Pintaudi et al., 2015       | 773/3851   | 128/11553     | 8                    | 18.12                     | 15.08  | 21.76  | 8.95     |
| Retnakaran et al., 2010     | 3/107      | 0/73          | 1                    | 4.09                      | 0.21   | 80.52  | 0.84     |
| Vambergue et al., 2008      | 53/295     | 1/111         | 6.8                  | 19.94                     | 2.79   | 142.47 | 1.73     |
| Vigneault et al., 2015      | 40/216     | 1/83          | 4                    | 15.37                     | 2.15   | 110.01 | 1.73     |
| Wang et al., 2012           | 327/1142   | 1067/18856    | 8.6                  | 5.06                      | 4.54   | 5.64   | 9.16     |
| Yefet et al.,2019           | 207/446    | 19/352        | 15.8                 | 8.60                      | 5.49   | 13.47  | 7.57     |
| Overall (I-squared = 96.5%) |            |               |                      | 9.51                      | 7.14   | 12.67  | 100.00   |

**Table of data in figure 3**

| Study                        | T2DM/GDM   | T2DM/CNTR     | FOLLOW-UP<br>(YEARS) | Relative Risk for<br>T2DM | 95% CI |        | % WEIGHT |
|------------------------------|------------|---------------|----------------------|---------------------------|--------|--------|----------|
| White                        |            |               |                      |                           |        |        |          |
| Aberg et al., 2002           | 21/229     | 1/60          | 1                    | 5.50                      | 0.76   | 40.08  | 1.70     |
| Albareda et al., 2003        | 96/696     | 0/70          | 11                   | 19.31                     | 1.21   | 307.59 | 0.96     |
| Chodick et al., 2010         | 1125/11270 | 1067/174146   | 5.4                  | 16.29                     | 15.02  | 17.68  | 9.22     |
| Huopio et al., 2014          | 28/489     | 1/385         | 7.3                  | 22.04                     | 3.01   | 161.30 | 1.70     |
| Linne et al., 2002           | 10/28      | 0/52          | 15                   | 37.14                     | 2.25   | 612.55 | 0.94     |
| Madarasz et al., 2009        | 14/68      | 0/39          | 4                    | 16.06                     | 0.98   | 262.31 | 0.95     |
| Subtotal (I-squared = 0.0%)  |            |               |                      | 16.28                     | 15.01  | 17.66  | 15.46    |
| Non-white                    |            |               |                      |                           |        |        |          |
| Aziz et al., 2018            | 11/78      | 0/89          | 2                    | 25.10                     | 1.50   | 420.20 | 0.93     |
| Herath et al., 2017          | 73/119     | 14/240        | 10                   | 10.52                     | 6.20   | 17.83  | 7.06     |
| Krishnaveni et al., 2007     | 13/35      | 8/489         | 5                    | 22.70                     | 10.09  | 51.10  | 5.33     |
| H. Lee et al., 2008          | 71/620     | 22/868        | 7                    | 4.52                      | 2.83   | 7.21   | 7.45     |
| Subtotal (I-squared = 78.2%) |            |               |                      | 10.38                     | 4.61   | 23.39  | 20.77    |
| Mixed                        |            |               |                      |                           |        |        |          |
| Daly et al., 2018            | 895/9118   | 142/37281     | 25                   | 25.77                     | 21.62  | 30.72  | 8.97     |
| A.J. Lee et al., 2007        | 405/5470   | 16/783        | 15                   | 3.62                      | 2.21   | 5.94   | 7.28     |
| Minooee et al., 2017         | 49/476     | 93/1982       | 15                   | 2.19                      | 1.58   | 3.06   | 8.26     |
| Mukerji et al., 2012         | 7755/33203 | 22479/1016905 | 15                   | 10.57                     | 10.32  | 10.82  | 9.28     |
| Pintaudi et al., 2015        | 773/3851   | 128/11553     | 8                    | 18.12                     | 15.08  | 21.76  | 8.95     |
| Retnakaran et al., 2010      | 3/107      | 0/73          | 1                    | 4.09                      | 0.21   | 80.52  | 0.84     |
| Vambergue et al., 2008       | 53/295     | 1/111         | 6.8                  | 19.94                     | 2.79   | 142.47 | 1.73     |
| Vigneault et al., 2015       | 40/216     | 1/83          | 4                    | 15.37                     | 2.15   | 110.01 | 1.73     |
| Wang et al., 2012            | 327/1142   | 1067/18856    | 8.6                  | 5.06                      | 4.54   | 5.64   | 9.16     |
| Yefet et al.,2019            | 207/446    | 19/352        | 15.8                 | 8.60                      | 5.49   | 13.47  | 7.57     |
| Subtotal (I-squared =97.8%)  |            |               |                      | 8.31                      | 5.44   | 12.69  | 63.77    |
| Overall (I-squared = 96.5%)  |            |               |                      | 9.51                      | 7.14   | 12.67  | 100.00   |

**Table of data in figure 4**

| Study                        | T2DM/GDM   | T2DM/CNTR     | FOLLOW-UP<br>(YEARS) | Relative Risk for<br>T2DM | 95% CI |        | % WEIGHT |
|------------------------------|------------|---------------|----------------------|---------------------------|--------|--------|----------|
| 1-5 Years                    |            |               |                      |                           |        |        |          |
| Aberg et al., 2002           | 21/229     | 1/60          | 1                    | 5.50                      | 0.76   | 40.08  | 1.70     |
| Retnakaran et al., 2010      | 3/107      | 0/73          | 1                    | 4.09                      | 0.21   | 80.52  | 0.84     |
| Aziz et al., 2018            | 11/78      | 0/89          | 2                    | 25.10                     | 1.50   | 420.20 | 0.93     |
| Madarasz et al., 2009        | 14/68      | 0/39          | 4                    | 16.06                     | 0.98   | 262.31 | 0.95     |
| Vigneault et al., 2015       | 40/216     | 1/83          | 4                    | 15.37                     | 2.15   | 110.01 | 1.73     |
| Krishnaveni et al., 2007     | 13/35      | 8/489         | 5                    | 22.70                     | 10.09  | 51.10  | 5.33     |
| Subtotal (I-squared = 0.0%)  |            |               |                      | 17.06                     | 8.95   | 32.55  | 11.48    |
| 5-10 Years                   |            |               |                      |                           |        |        |          |
| Chodick et al., 2010         | 1125/11270 | 1067/174146   | 5.4                  | 16.29                     | 15.02  | 17.68  | 9.22     |
| Vambergue et al., 2008       | 53/295     | 1/111         | 6.8                  | 19.94                     | 2.79   | 142.47 | 1.73     |
| H. Lee et al., 2008          | 71/620     | 22/868        | 7                    | 4.52                      | 2.83   | 7.21   | 7.45     |
| Huopio et al., 2014          | 28/489     | 1/385         | 7.3                  | 22.04                     | 3.01   | 161.30 | 1.70     |
| Pintaudi et al., 2015        | 773/3851   | 128/11553     | 8                    | 18.12                     | 15.08  | 21.76  | 8.95     |
| Wang et al., 2012            | 327/1142   | 1067/18856    | 8.6                  | 5.06                      | 4.54   | 5.64   | 9.16     |
| Herath et al., 2017          | 73/119     | 14/240        | 10                   | 10.52                     | 6.20   | 17.83  | 7.06     |
| Subtotal (I-squared = 98.2%) |            |               |                      | 10.42                     | 5.68   | 19.11  | 45.26    |
| More than 10 Years           |            |               |                      |                           |        |        |          |
| Albareda et al., 2003        | 96/696     | 0/70          | 11                   | 19.31                     | 1.21   | 307.59 | 0.96     |
| A.J. Lee et al., 2007        | 405/5470   | 16/783        | 15                   | 3.62                      | 2.21   | 5.94   | 7.28     |
| Linne et al., 2002           | 10/28      | 0/52          | 15                   | 37.14                     | 2.25   | 612.55 | 0.94     |
| Minooee et al., 2017         | 49/476     | 93/1982       | 15                   | 2.19                      | 1.58   | 3.06   | 8.26     |
| Mukerji et al., 2012         | 7755/33203 | 22479/1016905 | 15                   | 10.57                     | 10.32  | 10.82  | 9.28     |
| Yefet et al.,2019            | 207/446    | 19/352        | 15.8                 | 8.60                      | 5.49   | 13.47  | 7.57     |
| Daly et al., 2018            | 895/9118   | 142/37281     | 25                   | 25.77                     | 21.62  | 30.72  | 8.97     |
| Subtotal (I-squared = 97.1%) |            |               |                      | 8.09                      | 4.34   | 15.08  | 43.26    |
| Overall (I-squared = 96.5%)  |            |               |                      | 9.51                      | 7.14   | 12.67  | 100.00   |

| Preferred Reporting Items for Systematic Reviews and Meta-Analyses (PRISMA) Checklist |    |                                                                                                                                                                                                                                                                                                             |                        |
|---------------------------------------------------------------------------------------|----|-------------------------------------------------------------------------------------------------------------------------------------------------------------------------------------------------------------------------------------------------------------------------------------------------------------|------------------------|
| Section/topic                                                                         | #  | Checklist item                                                                                                                                                                                                                                                                                              | Reported on page #     |
| <b>TITLE</b>                                                                          |    |                                                                                                                                                                                                                                                                                                             |                        |
| Title                                                                                 | 1  | Identify the report as a systematic review, meta-analysis, or both.                                                                                                                                                                                                                                         | 0                      |
| <b>ABSTRACT</b>                                                                       |    |                                                                                                                                                                                                                                                                                                             |                        |
| Structured summary                                                                    | 2  | Provide a structured summary including, as applicable: background; objectives; data sources; study eligibility criteria, participants, and interventions; study appraisal and synthesis methods; results; limitations; conclusions and implications of key findings; systematic review registration number. | 1                      |
| <b>INTRODUCTION</b>                                                                   |    |                                                                                                                                                                                                                                                                                                             |                        |
| Rationale                                                                             | 3  | Describe the rationale for the review in the context of what is already known.                                                                                                                                                                                                                              | 2-3                    |
| Objectives                                                                            | 4  | Provide an explicit statement of questions being addressed with reference to participants, interventions, comparisons, outcomes, and study design (PICOS).                                                                                                                                                  | 2-3                    |
| <b>METHODS</b>                                                                        |    |                                                                                                                                                                                                                                                                                                             |                        |
| Protocol and registration                                                             | 5  | Indicate if a review protocol exists, if and where it can be accessed (e.g., Web address), and, if available, provide registration information including registration number.                                                                                                                               | 3                      |
| Eligibility criteria                                                                  | 6  | Specify study characteristics (e.g., PICOS, length of follow-up) and report characteristics (e.g., years considered, language, publication status) used as criteria for eligibility, giving rationale.                                                                                                      | 3                      |
| Information sources                                                                   | 7  | Describe all information sources (e.g., databases with dates of coverage, contact with study authors to identify additional studies) in the search and date last searched.                                                                                                                                  | 3-4                    |
| Search                                                                                | 8  | Present full electronic search strategy for at least one database, including any limits used, such that it could be repeated.                                                                                                                                                                               | Supplementary material |
| Study selection                                                                       | 9  | State the process for selecting studies (i.e., screening, eligibility, included in systematic review, and, if applicable, included in the meta-analysis).                                                                                                                                                   | 3-4, Figure 1          |
| Data collection process                                                               | 10 | Describe method of data extraction from reports (e.g., piloted forms, independently, in duplicate) and any processes for obtaining and confirming data from investigators.                                                                                                                                  | 3-4                    |

|                                    |    |                                                                                                                                                                                                                        |                                |
|------------------------------------|----|------------------------------------------------------------------------------------------------------------------------------------------------------------------------------------------------------------------------|--------------------------------|
| Data items                         | 11 | List and define all variables for which data were sought (e.g., PICOS, funding sources) and any assumptions and simplifications made.                                                                                  | 3,4,5                          |
| Risk of bias in individual studies | 12 | Describe methods used for assessing risk of bias of individual studies (including specification of whether this was done at the study or outcome level), and how this information is to be used in any data synthesis. | 4-5,<br>Supplementary material |
| Summary measures                   | 13 | State the principal summary measures (e.g., risk ratio, difference in means).                                                                                                                                          | 4-5                            |
| Synthesis of results               | 14 | Describe the methods of handling data and combining results of studies, if done, including measures of consistency (e.g., $I^2$ ) for each meta-analysis.                                                              | 4-5                            |

Page 1 of 2

| Section/topic                 | #  | Checklist item                                                                                                                                                                                           | Reported on page #             |
|-------------------------------|----|----------------------------------------------------------------------------------------------------------------------------------------------------------------------------------------------------------|--------------------------------|
| Risk of bias across studies   | 15 | Specify any assessment of risk of bias that may affect the cumulative evidence (e.g., publication bias, selective reporting within studies).                                                             | 4-5,<br>Supplementary material |
| Additional analyses           | 16 | Describe methods of additional analyses (e.g., sensitivity or subgroup analyses, meta-regression), if done, indicating which were pre-specified.                                                         | 4-5                            |
| <b>RESULTS</b>                |    |                                                                                                                                                                                                          |                                |
| Study selection               | 17 | Give numbers of studies screened, assessed for eligibility, and included in the review, with reasons for exclusions at each stage, ideally with a flow diagram.                                          | 6, Figure 1                    |
| Study characteristics         | 18 | For each study, present characteristics for which data were extracted (e.g., study size, PICOS, follow-up period) and provide the citations.                                                             | 6, Table 1                     |
| Risk of bias within studies   | 19 | Present data on risk of bias of each study and, if available, any outcome level assessment (see item 12).                                                                                                | 6-8,<br>Supplementary material |
| Results of individual studies | 20 | For all outcomes considered (benefits or harms), present, for each study: (a) simple summary data for each intervention group (b) effect estimates and confidence intervals, ideally with a forest plot. | 6-8, Figures 2-4               |
| Synthesis of results          | 21 | Present results of each meta-analysis done, including confidence intervals and measures of consistency.                                                                                                  | 7-8                            |
| Risk of bias across studies   | 22 | Present results of any assessment of risk of bias across studies (see Item 15).                                                                                                                          | 6-8,                           |

|                     |    |                                                                                                                                                                                      |                        |
|---------------------|----|--------------------------------------------------------------------------------------------------------------------------------------------------------------------------------------|------------------------|
|                     |    |                                                                                                                                                                                      | Supplementary material |
| Additional analysis | 23 | Give results of additional analyses, if done (e.g., sensitivity or subgroup analyses, meta-regression [see Item 16]).                                                                | 7-8                    |
| <b>DISCUSSION</b>   |    |                                                                                                                                                                                      |                        |
| Summary of evidence | 24 | Summarize the main findings including the strength of evidence for each main outcome; consider their relevance to key groups (e.g., healthcare providers, users, and policy makers). | 9-11                   |
| Limitations         | 25 | Discuss limitations at study and outcome level (e.g., risk of bias), and at review-level (e.g., incomplete retrieval of identified research, reporting bias).                        | 9-11                   |
| Conclusions         | 26 | Provide a general interpretation of the results in the context of other evidence, and implications for future research.                                                              | 11                     |
| <b>FUNDING</b>      |    |                                                                                                                                                                                      |                        |
| Funding             | 27 | Describe sources of funding for the systematic review and other support (e.g., supply of data); role of funders for the systematic review.                                           | 16                     |

From: Moher D, Liberati A, Tetzlaff J, Altman DG, The PRISMA Group (2009). Preferred Reporting Items for Systematic Reviews and Meta-Analyses: The PRISMA Statement. PLoS Med 6(7): e1000097. doi:10.1371/journal.pmed1000097

For more information, visit: [www.prisma-statement.org](http://www.prisma-statement.org).

## MOOSE (Meta-analyses Of Observational Studies in Epidemiology) Checklist

| Reporting Criteria                                                                                              | Reported (Yes/No) |  | Reported on Page No.        |  |  |
|-----------------------------------------------------------------------------------------------------------------|-------------------|--|-----------------------------|--|--|
| <b>Reporting of Background</b>                                                                                  |                   |  |                             |  |  |
| Problem definition                                                                                              | Yes               |  | 2                           |  |  |
| Hypothesis statement                                                                                            | Yes               |  | 2-3                         |  |  |
| Description of Study Outcome(s)                                                                                 | Yes               |  | 2-3                         |  |  |
| Type of exposure or intervention used                                                                           | Yes               |  | 2-3                         |  |  |
| Type of study design used                                                                                       | Yes               |  | 2-3                         |  |  |
| Study population                                                                                                | Yes               |  | 2-3                         |  |  |
| <b>Reporting of Search Strategy</b>                                                                             |                   |  |                             |  |  |
| Qualifications of searchers (eg, librarians and investigators)                                                  | Yes               |  | 3                           |  |  |
| Search strategy, including time period included in the synthesis and keywords                                   | Yes               |  | 3, Supplementary Material   |  |  |
| Effort to include all available studies, including contact with authors                                         | Yes               |  | 3-4                         |  |  |
| Databases and registries searched                                                                               | Yes               |  | 3                           |  |  |
| Search software used, name and version, including special features used (eg, explosion)                         | Yes               |  | 3, Supplementary Material   |  |  |
| Use of hand searching (eg, reference lists of obtained articles)                                                | Yes               |  | 3                           |  |  |
| List of citations located and those excluded, including justification                                           | Yes               |  | 6, Figure 1                 |  |  |
| Method for addressing articles published in languages other than English                                        | Yes               |  | 3,9, Supplementary Material |  |  |
| Method of handling abstracts and unpublished studies                                                            | Yes               |  | 3                           |  |  |
| Description of any contact with authors                                                                         | Yes               |  | 3-4                         |  |  |
| <b>Reporting of Methods</b>                                                                                     |                   |  |                             |  |  |
| Description of relevance or appropriateness of studies assembled for assessing the hypothesis to be tested      | Yes               |  | 3,6                         |  |  |
| Rationale for the selection and coding of data (eg, sound clinical principles or convenience)                   | Yes               |  | 4-5                         |  |  |
| Documentation of how data were classified and coded (eg, multiple raters, blinding, and interrater reliability) | Yes               |  | 4, Supplementary Material   |  |  |
| Assessment of confounding (eg, comparability of cases and controls in studies where appropriate)                | Yes               |  | 4, Supplementary Material   |  |  |

| Reporting Criteria                                                                                                                                                                                                                                                           | Reported (Yes/No) |     |  | Reported on Page No.                            |                         |  |
|------------------------------------------------------------------------------------------------------------------------------------------------------------------------------------------------------------------------------------------------------------------------------|-------------------|-----|--|-------------------------------------------------|-------------------------|--|
| Assessment of study quality, including blinding of quality assessors; stratification or regression on possible predictors of study results                                                                                                                                   | Yes               |     |  | 4, 5, 6,7,8, Supplementary Material             |                         |  |
| Assessment of heterogeneity                                                                                                                                                                                                                                                  |                   | Yes |  |                                                 | 4, 7,8, Tables, Figures |  |
| Description of statistical methods (eg, complete description of fixed or random effects models, justification of whether the chosen models account for predictors of study results, dose-response models, or cumulative meta-analysis) in sufficient detail to be replicated | Yes               |     |  | 4, 5, Supplementary Material                    |                         |  |
| Provision of appropriate tables and graphics                                                                                                                                                                                                                                 | Yes               |     |  | Tables1-3 + Figures 1-4, Supplementary Material |                         |  |
| Reporting of Results                                                                                                                                                                                                                                                         |                   |     |  |                                                 |                         |  |
| Table giving descriptive information for each study included                                                                                                                                                                                                                 | Yes               |     |  | Table 1                                         |                         |  |
| Results of sensitivity testing (eg, subgroup analysis)                                                                                                                                                                                                                       | Yes               |     |  | 7-8, and relevant tables/figures                |                         |  |
| Indication of statistical uncertainty of findings                                                                                                                                                                                                                            | Yes               |     |  | 7-8                                             |                         |  |
| Reporting of Discussion                                                                                                                                                                                                                                                      |                   |     |  |                                                 |                         |  |
| Quantitative assessment of bias (eg, publication bias)                                                                                                                                                                                                                       | Yes               |     |  | 9-10                                            |                         |  |
| Justification for exclusion (eg, exclusion of non–English-language citations)                                                                                                                                                                                                | Yes               |     |  | 9                                               |                         |  |
| Assessment of quality of included studies                                                                                                                                                                                                                                    |                   | Yes |  |                                                 | 9-10                    |  |
| Reporting of Conclusions                                                                                                                                                                                                                                                     |                   |     |  |                                                 |                         |  |
| Consideration of alternative explanations for observed results                                                                                                                                                                                                               | Yes               |     |  | 9-11                                            |                         |  |
| Generalization of the conclusions (ie, appropriate for the data presented and within the domain of the literature review)                                                                                                                                                    | Yes               |     |  | 9-11                                            |                         |  |
| Guidelines for future research                                                                                                                                                                                                                                               |                   | Yes |  |                                                 | 11                      |  |
| Disclosure of funding source                                                                                                                                                                                                                                                 |                   | Yes |  |                                                 | 16                      |  |
